# Supplementary material
Source: MDPI journal article supplement (https://www.mdpi.com/2673-4591/37/1/79)
Supplement: s1 [file s1]

## Supplementary materials

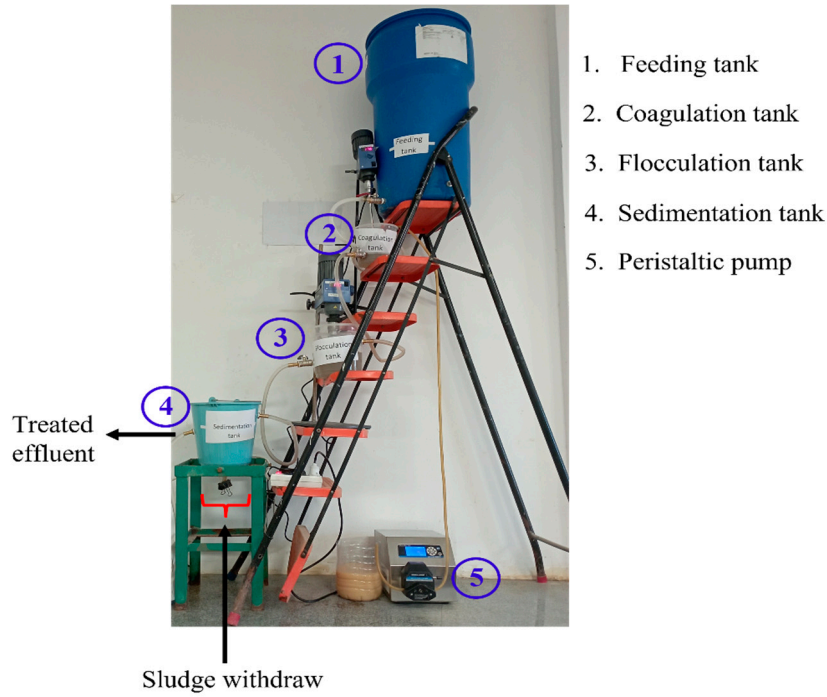

**Figure S1.** Continuous bench-scale plant consisting of C/F/S stages for treating washing bay effluent.

**Table S1.** Computation of *C. arietinum* and alum coagulant costs.

$$\begin{aligned}
 C. \text{arietinum cost} &= \text{Consumption} \times \text{Price} = 2.255 \frac{\text{g}}{\text{L}} \times 1.45 \frac{\text{US\$}}{\text{kg}} \\
 &= 2.255 \frac{\text{kg}}{\text{m}^3} \times 1.45 \frac{\text{US\$}}{\text{kg}} \approx 3.26 \frac{\text{US\$}}{\text{m}^3}
 \end{aligned}$$

$$\begin{aligned}
 \text{Alum cost} &= \text{Consumption} \times \text{Price} = 0.138 \frac{\text{g}}{\text{L}} \times 8.20 \frac{\text{US\$}}{\text{kg}} \\
 &= 0.138 \frac{\text{kg}}{\text{m}^3} \times 8.20 \frac{\text{US\$}}{\text{kg}} \approx 1.13 \frac{\text{US\$}}{\text{m}^3}
 \end{aligned}$$
